# Supplementary material for: Polymer-mediated growth of fluorescent semiconductor nanoparticles in preformed nanocomposites
Source: Royal Society of Chemistry journal article supplement (doi:10.1039/c004279j), 2010-01-01
Supplement: c004279j.pdf [file c004279j.pdf]

## **Supporting information:**

### **Polymer-Mediated Growth of Fluorescent Semiconductor Nanoparticles in Preformed Nanocomposites**

*Yue Tang, Hao Zhang, Zhanxi Fan, Minjie Li, Jishu Han, Fengxia Dong, Bai Yang\**

*State Key Laboratory of Supramolecular Structure and Materials, Jilin University,*

*Changchun 130012, P. R. China*

*E-mail: byangchem@jlu.edu.cn*

**Figure S1** The relationship of OR growth and dynamic coalescence occurred as NPs grew in aqueous solutions and in polymer films. NP concentrations were calculated from the corresponding UV-vis peak intensity. The polymer used here was PS.

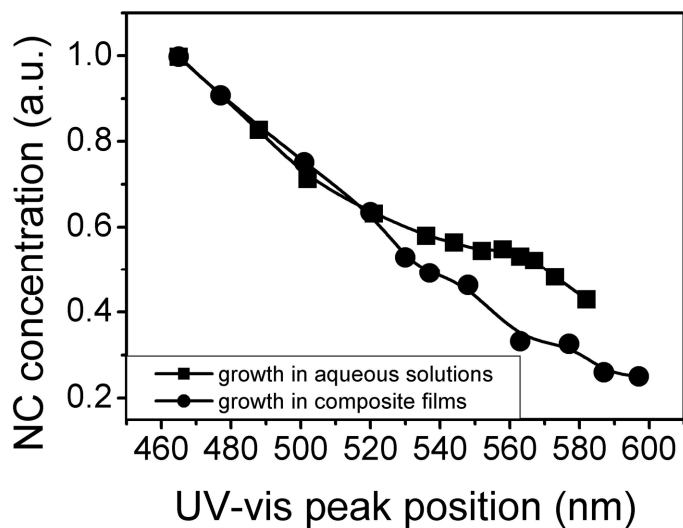

**Figure S2** Temporal evolution profiles of the UV-vis peak positions (a) and corresponding NP diameters (b) of CdTe-PVP ( $M_n=1,300,000$ ) composite films obtained under different annealing temperatures. The concentration of NPs was fixed at 20 mM.

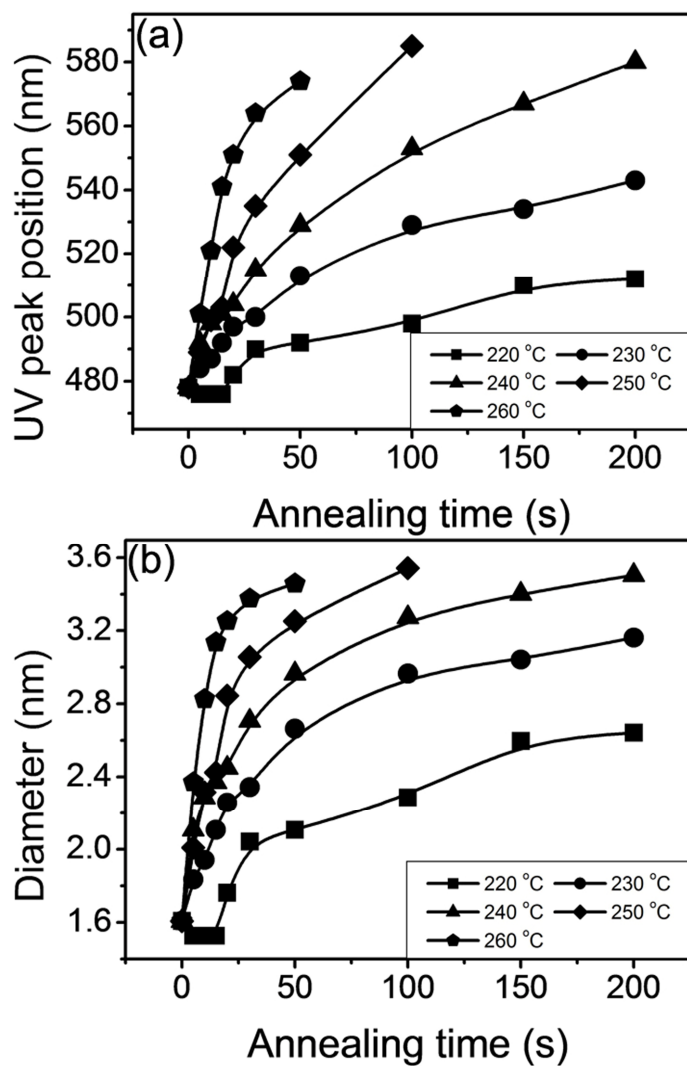

**Figure S3** Temporal evolution profiles of the diameters of CdTe NPs during annealing at 140 °C in PS and PMS. The concentration of NPs was fixed at 2 mM. Corresponding evolution of the UV-vis peak position was indicated in Figure 5.

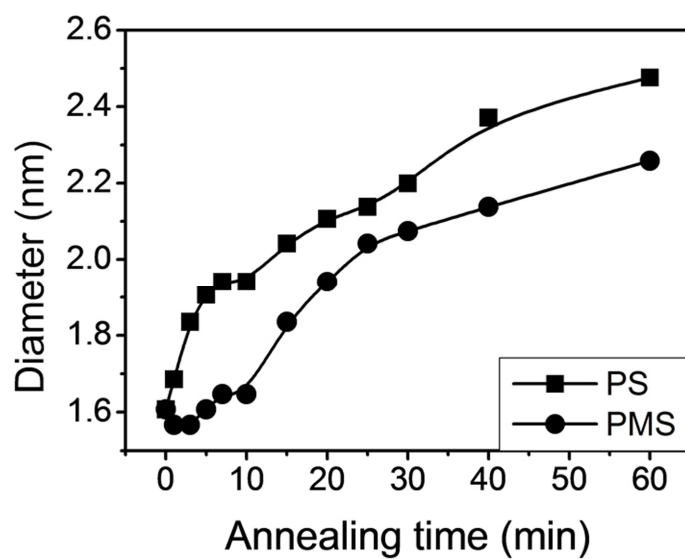

**Figure S4** Temporal evolution profiles of the diameters of CdTe NPs during annealing at 180 °C in PS and PC. The concentration of NPs was fixed at 20 mM. Corresponding evolution of the UV-vis peak position was indicated in Figure 6a.

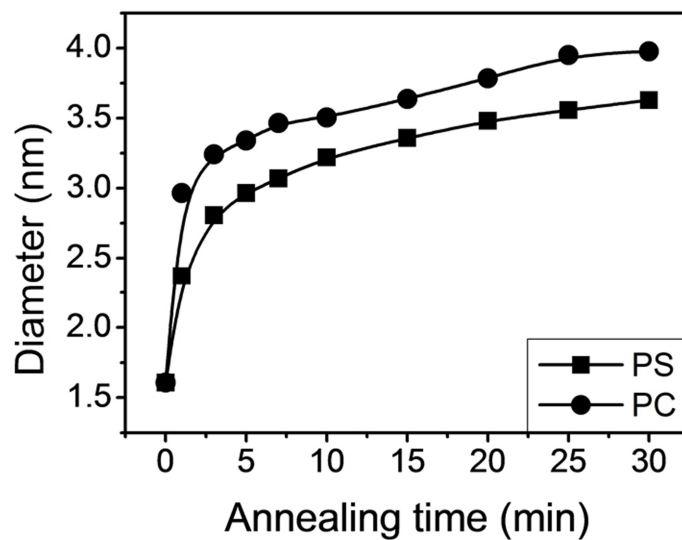

**Figure S5** Temporal evolution profiles of the diameters of CdTe NPs during annealing at 180 °C in PMMA and PVA (a), and PS and AFPS (b). The concentration of NPs was fixed at 20 mM. Corresponding evolution of the UV-vis peak position was indicated in Figure 7.

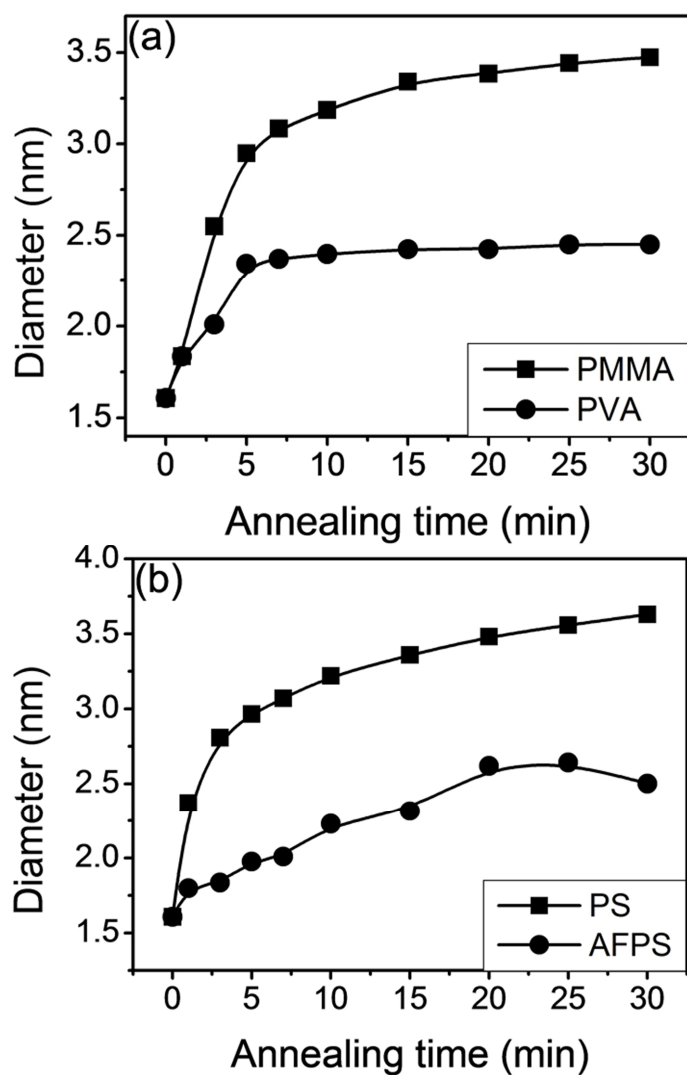

**Figure S6** DSC curves of AFPS and CdTe NP-AFPS composites.

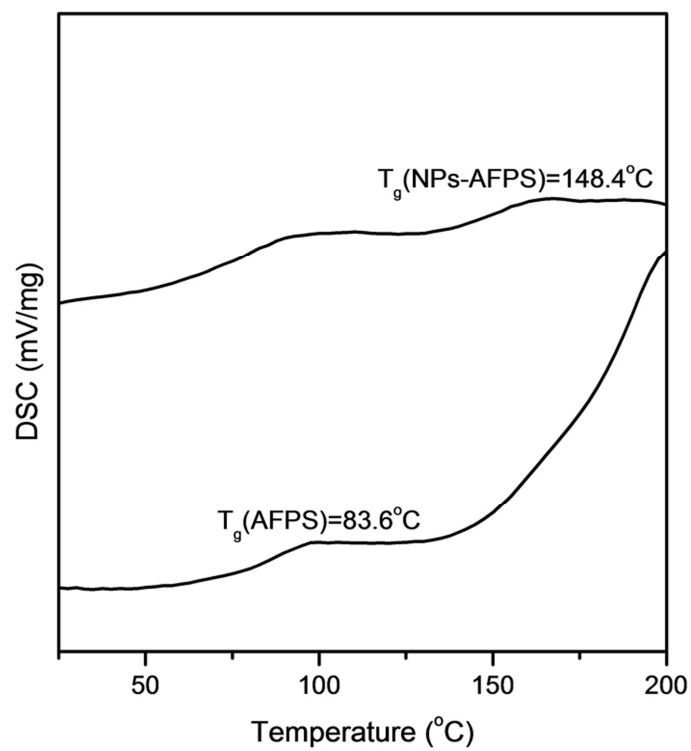

**Figure S7** Temporal evolution profiles of the diameters of CdTe NPs during annealing at 180 °C in PS with different  $M_n$ . The concentration of NPs was fixed at 2 mM. Corresponding evolution of the UV-vis peak position was indicated in Figure 8.

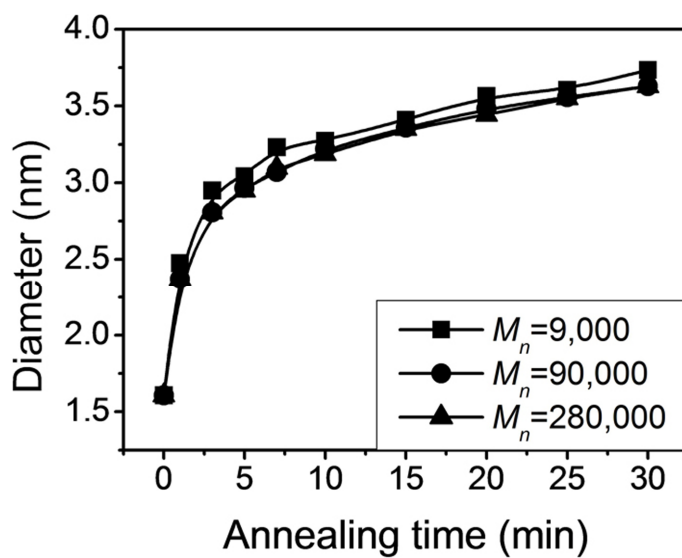



**Figure S8** DSC curves of PS with the molar mass of 9,000, 90,000 and 280,000.

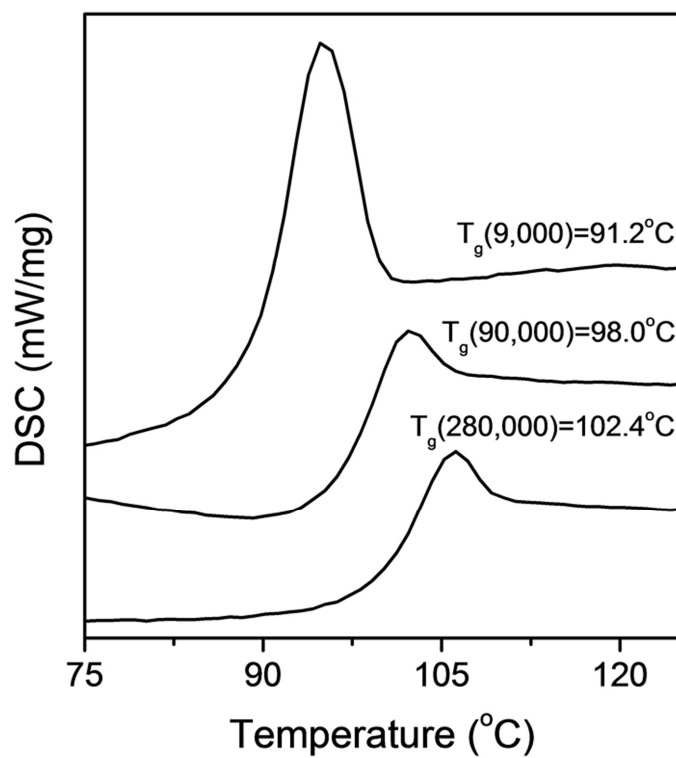

**Table S1** Data and error bars of the temporal evolution of the UV-vis peak position of CdTe-PS and CdTe-PMS composites. Corresponding figure was indicated in Figure 5.

| <b>Time (min)</b> | <b>PS (<math>M_n</math> of 90,000) (nm)</b> | <b>PMS (nm)</b> |
|-------------------|---------------------------------------------|-----------------|
| 0                 | 478                                         | 478             |
| 1                 | 480±4                                       | 477±3           |
| 3                 | 484±4                                       | 477±3           |
| 5                 | 486±4                                       | 478±3           |
| 7                 | 487±4                                       | 479±3           |
| 10                | 487±4                                       | 479±3           |
| 15                | 490±5                                       | 484±3           |
| 20                | 492±4                                       | 487±3           |
| 25                | 493±4                                       | 490±3           |
| 30                | 495±5                                       | 491±3           |
| 40                | 501±4                                       | 493±3           |
| 60                | 505±4                                       | 497±2           |

**Table S2** Data and error bars of the temporal evolution of the UV-vis peak position of CdTe-PS composites with different  $M_n$ , 9,000, 90,000 and 280,000. Corresponding figure was indicated in Figure 8.

| Time(min) | PS ( $M_n$ of 9,000) (nm) | PS ( $M_n$ of 90,000) | PS ( $M_n$ of 280,000) (nm) |
|-----------|---------------------------|-----------------------|-----------------------------|
| 0         | 478                       | 478                   | 478                         |
| 1         | 505±5                     | 501±9                 | 501±4                       |
| 3         | 528±2                     | 520±6                 | 520±4                       |
| 5         | 534±7                     | 529±3                 | 528±4                       |
| 7         | 549±0                     | 536±5                 | 538±4                       |
| 10        | 553±5                     | 548±3                 | 545±4                       |
| 15        | 568±4                     | 562±2                 | 561±4                       |
| 20        | 588±1                     | 577±1                 | 572±4                       |
| 25        | 593±6                     | 587±0                 | 586±4                       |
| 30        | 608±2                     | 596±2                 | 596±5                       |

**Table S3** DSC measurement of the  $T_g$  of PS ( $M_n$  of 90,000), PMMA, PVP, AFPS, and the corresponding NP-polymer composites. On the analysis of the data below, we could convincingly claim that the  $T_g$  of non-crosslinking polymers such as PS, PMMA and PVP were varied slightly after commingled with NPs.

| <b>Polymers</b>       | <b>Theoretical <math>T_g</math> (°C)</b> | <b>Measured <math>T_g</math> (°C)</b> | <b>Measured <math>T_g</math> of NP-Polymer Composites</b> |
|-----------------------|------------------------------------------|---------------------------------------|-----------------------------------------------------------|
| PS ( $M_n$ of 90,000) | 98                                       | 98.0                                  | 111.2                                                     |
| PMMA                  | 125                                      | 124.6                                 | 121.5                                                     |
| PVP                   | 175                                      | 177.4                                 | 175.5                                                     |
| AFPS                  |                                          | 83.6                                  | 148.4                                                     |
